# Supplementary material
Source: publisher site journal article supplement (https://www.dovepress.com/article/459142)
Supplement: Supplementary file 1 [file get_supplementary_file.php]

Supplementary table 1. The mutation types, drug resistance patterns, and interpretation of results

| Mutation type | Resistance pattern | *ΔTm*=*Tm*(wild)-*Tm*(mutation) | | | |
| --- | --- | --- | --- | --- | --- |
| FAM | HEX | ROX | Cy5 |
| *rrs*_A1401G | KM, AM, CM | 6.7±1.4 | -a | - | - |
| *rrs*_C1402T | KM, CM, VM | 10.0±1.4 | - | - | - |
| *rrs*_G1473A | CM, VM | - | 4.5±1.4 | - | - |
| *rrs*_G1473T | CM, VM | - | 3.0±1.4 | - | - |
| *rrs*_G1484T | KM, AM, CM, VM | - | -5.0±1.4 | - | - |
| *eis*_G-37T | KM | - | - | - | 4.4±1.4 |
| *eis*_C-14T | KM | - | - | 5.0±1.4 | - |
| *eis*_A-13G | KM | - | - | 5.3±1.4 | - |
| *eis*_C-12T | Sensitive | - | - | -2.0±1.4 | - |
| *eis*_G-10A | KM | - | - | 5.0±1.4 | - |

Note: KM, kanamycin; AM, amikacin; CM, capreomycin; VM, viomycin

a, The difference between the melting peak *Tm* of the detected sample and the corresponding wild-type is within ±1 degree.
